# Supplementary material for: Virus Adaptation Following Experimental Infection of Chickens with a Domestic Duck Low Pathogenic Avian Influenza Isolate from the 2017 USA H7N9 Outbreak Identifies Polymorphic Mutations in Multiple Gene Segments
Source: MDPI journal article supplement (doi:10.3390/v13061166), 2021-06-18
Supplement: s1 [file s1]

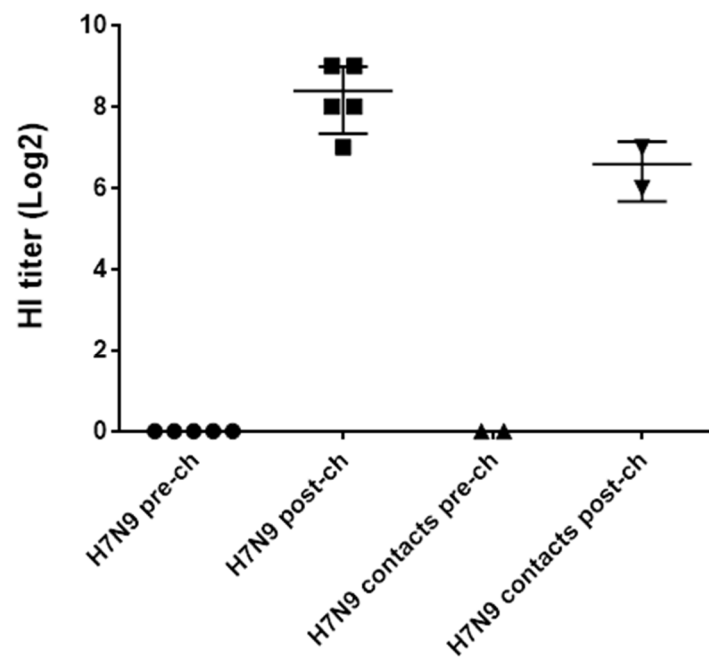

**Figure S1.** Individual HI titers (log2) and standard error for bird groups against A/duck/AL/2017 (H7N9) challenge virus; pre challenge (pre-ch) and two weeks post-challenge (post-ch).

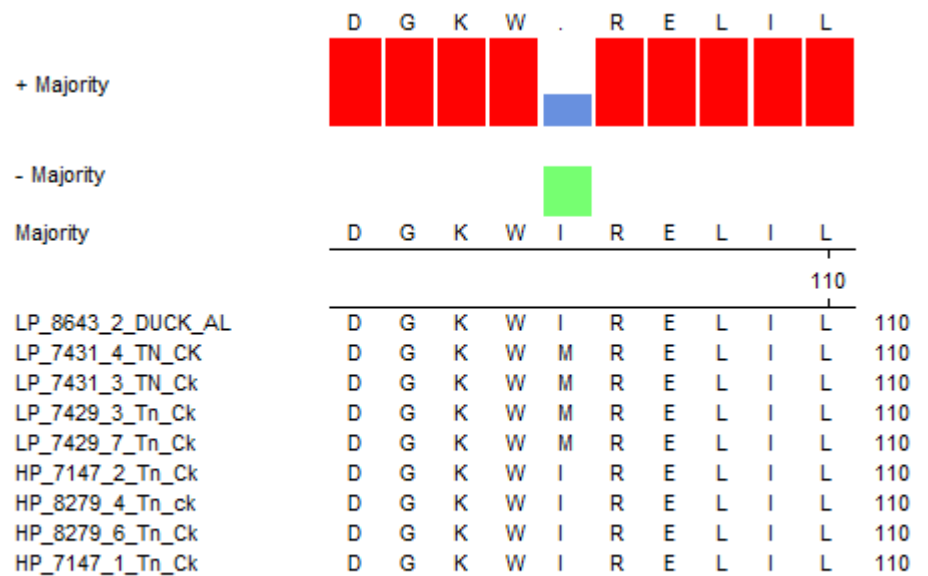

**Figure S2.** Alignment of nucleoprotein segments of low pathogenic avian influenza (LPAI) and highly pathogenic avian influenza (HPAI) viruses of H7N9 subtypes recovered from clinical specimens of chicken and duck obtained during the 2017 U.S. outbreak. The changes at position 105 in NP proteins are demonstrated. GenBank accession numbers: MF357837.1, KY818820.1, MF357789.1, MF357797.1, KY818812.1, KY818836.1, MF357829.1, MF357741.1.

**Table S1:** The synonymous changes found in A/duck/AL/2017 (H7N9) viral genome segments recovered from cloacal swab samples. The frequencies of variants were computed using with minimum sequence coverage of 500 reads cover the base, and minimum variant frequency of 5%. The maximum P-value of 10<sup>-6</sup> and minimum strand-bias p-value of 10<sup>-5</sup> when exceeding 65% bias were used to call the variants with average quality >35.

| Segment | CDS Codon<br>Number | Change | Codon Change | Variant<br>Frequency | Coverage |
|---------|---------------------|--------|--------------|----------------------|----------|
| PB2     | 67                  | C -> A | AUC -> AUA   | 12.5                 | 7676     |
|         | 74                  | G -> A | GGG -> GGA   | 5                    | 5704     |
|         | 412                 | G -> A | AAG -> AAA   | 16.3                 | 1046     |
|         | 637                 | T -> A | ACU -> ACA   | 6.6                  | 1100     |
|         | 643                 | A -> C | UCA -> UCC   | 7.7                  | 2302     |
|         | 662                 | C -> A | ACC -> ACA   | 8.5                  | 9170     |
|         | 666                 | A -> T | ACA -> ACT   | 7.1                  | 5883     |
| PB1     | 255                 | T -> A | GUU -> GUA   | 65.5                 | 1283     |
|         | 257                 | A -> G | ACA -> ACG   | 8.8                  | 1047     |
|         | 472                 | G -> A | CUG -> CUA   | 19.8                 | 4084     |
|         | 582                 | A -> G | CAA -> CAG   | 6.4                  | 1802     |
| PA      | 92                  | C -> T | AAC -> AAT   | 6.3                  | 2576     |
|         | 100                 | C -> T | GUC -> GUT   | 5.5                  | 6202     |
|         | 553                 | A -> G | GCA -> GCG   | 6.5                  | 1587     |
| NP      | 410                 | C -> T | CCC -> CCT   | 8.5                  | 21779    |
| NS      | 79                  | G -> T | CUG -> CUT   | 8.4                  | 17513    |
|         | 131                 | A -> G | AAA -> AAG   | 18.8                 | 19188    |
